# Supplementary material for: Targetable NOTCH1 rearrangements in reninoma
Source: PubMed Central journal article supplement (PMC10519988; doi:10.1038/s41467-023-41118-8), 2023-09-25
Supplement: 41467_2023_41118_MOESM3_ESM.pdf [file 41467_2023_41118_MOESM3_ESM.pdf]

## **Description of Additional Supplementary File**

**Supplementary Data 1.** Overview of study cohort.

**Supplementary Data 2.** Somatic substitutions and indels.

**Supplementary Data 3.** Somatic rearrangements.

**Supplementary Data 4.** Antibodies used for immunostaining.

**Supplementary Data 5.** Healthy kidney markers.

**Supplementary Data 6.** PD50642a markers.

**Supplementary Data 7.** PD54845a markers.

**Supplementary Data 8.** Differentially expressed genes
